# Supplementary material for: Determinants and indicators of successful ageing associated with mortality: a 4-year population-based study
Source: Aging (Albany NY). 2020 Feb 6;12(3):2670–9. doi: 10.18632/aging.102769 (PMC7041724; doi:10.18632/aging.102769)
Supplement: Supplementary Table 1 [file aging-12-102769-s001..pdf]

## SUPPLEMENTARY TABLE

**Supplementary Table 1. Factor scoring coefficients derived from a generated regression model.**

| Factor one: Physical activity                    |             | Factor two: Life satisfaction and financial status |             | Factor three: Health status          |             | Factor four: Stress               |             | Factor five: Cognitive function       |             |
|--------------------------------------------------|-------------|----------------------------------------------------|-------------|--------------------------------------|-------------|-----------------------------------|-------------|---------------------------------------|-------------|
| Item                                             | Coefficient | Item                                               | Coefficient | Item                                 | Coefficient | Item                              | Coefficient | Item                                  | Coefficient |
| Standing continuously for 15 minutes             | 0.049       | Satisfaction of current living situation           | 0.215       | Multimorbidity                       | 0.294       | Stress on one's own finances      | 0.235       | Orientation to time (year)            | 0.229       |
| Raising both hands over head                     | 0.109       | Happy                                              | 0.401       | Subjective rated health              | 0.276       | Stress on family member's health  | 0.279       | Orientation to time (month)           | 0.260       |
| Grasping or turning objects with fingers         | 0.107       | Life goes well                                     | 0.411       | Pain                                 | 0.250       | Stress on family member's finance | 0.341       | Orientation to time (date)            | 0.249       |
| Walking 200–300 meters                           | 0.013       | Meeting living expenses                            | 0.144       | Health status evaluated by observers | 0.262       | Stress on family member's job     | 0.326       | Orientation to time (day of the week) | 0.196       |
| Climbing 2–3 flights of stairs                   | 0.011       | Helpless in dealing with problems of life          | –0.089      |                                      |             |                                   |             | Orientation (current President)       | 0.209       |
| Buying personal items                            | 0.058       | Subjective socioeconomic status                    | 0.153       |                                      |             |                                   |             | Orientation (former President)        | 0.203       |
| Managing money/ paying bills                     | 0.078       |                                                    |             |                                      |             |                                   |             |                                       |             |
| Riding bus/train by yourself                     | 0.020       |                                                    |             |                                      |             |                                   |             |                                       |             |
| Doing light tasks at home                        | 0.056       |                                                    |             |                                      |             |                                   |             |                                       |             |
| Bathing                                          | 0.115       |                                                    |             |                                      |             |                                   |             |                                       |             |
| Dressing                                         | 0.129       |                                                    |             |                                      |             |                                   |             |                                       |             |
| Eating                                           | 0.136       |                                                    |             |                                      |             |                                   |             |                                       |             |
| Getting out of bed/ standing up/sitting in chair | 0.129       |                                                    |             |                                      |             |                                   |             |                                       |             |
| Moving around the house                          | 0.126       |                                                    |             |                                      |             |                                   |             |                                       |             |
| Toilet                                           | 0.129       |                                                    |             |                                      |             |                                   |             |                                       |             |
